# Supplementary material
Source: Springer Nature journal article supplement (https://www.springermedizin.de/resource/supplementary/12891_2011_1640_MOESM2_ESM.pdf/9509042)
Supplement: MOESM2 [file 9509042]

# Shoulder Physical Exam Validity Trial

Patient ID Number    
Investigator Patient #

Patient Initials  Date     
F L DD MM YYYY

## Surgical Evaluation

### 1. Anterior Labrum

1.1 Please describe the **anterior labrum** using the following descriptors

- Normal appearing labrum
- Degenerative
- Torn (soft tissue Bankart lesion)
- Bony Bankart lesion
- <10% off of glenoid
- 10-25% off of glenoid
- >25% off of glenoid

### 2. Posterior Labrum

2.1 Please describe the **posterior labrum** using the following descriptors

- Normal appearing labrum
- Degenerative
- Torn (Reverse Bankart lesion)

### 3. Cartilage

3.1 Please describe the **glenoid cartilage** using the following descriptors

- Normal
- Grade I (mild cartilage fibrillation)
- Grade II (significant fibrillation but not to bone)
- Grade III (fibrillation to bone)
- Grade IV (exposed subchondral bone)

3.2 If not Normal, please describe the **size** of the lesion

Width  -   
Length  -   
 cm  mm  
 cm  mm

3.3 Please describe the **humeral head cartilage** using the following descriptors

- Normal
- Grade I (mild cartilage fibrillation)
- Grade II (significant fibrillation but not to bone)
- Grade III (fibrillation to bone)
- Grade IV (exposed subchondral bone)

3.4 If not Normal, please describe the **size** of the lesion

Width  -   
Length  -   
 cm  mm  
 cm  mm

3.5 Please describe whether there is a **Hill Sachs lesion**

- Present
- Absent

3.6 If **Present**, please describe the **size** of the lesion

Width  -   
Depth  -   
 cm  mm  
 cm  mm
